# Supplementary material
Source: PubMed Central journal article supplement (PMC4563761)
Supplement: JCI81534sd.pdf [file JCI81534sd.pdf]

## Supplemental Material for: *Med12* Gain-of-Function Mutation Causes Leiomyomas and Genomic Instability

**Authors:** Priya Mittal<sup>1</sup>, Yong-hyun Shin<sup>2</sup>, Svetlana. A. Yatsenko<sup>2, 3</sup>, Carlos.A.Castro<sup>2</sup>, Urvashi Surti<sup>1,2, 3</sup>, Aleksandar Rajkovic<sup>1,2,3</sup>

### Affiliations:

<sup>1</sup>Department of Human Genetics, Graduate School of Public Health, University of Pittsburgh, Pittsburgh, PA, 15261.

<sup>2</sup>Department of Obstetrics, Gynecology and Reproductive Sciences, Magee-Womens Research Institute, Pittsburgh, PA, 15213.

<sup>3</sup>Department of Pathology, University of Pittsburgh, Pittsburgh, PA, 15261.

Corresponding author: E-mail: rajkovic2@mail.magee.edu

### Supplemental Methods

#### Generation of *Med12* Rosa knock-in mice

*Med12* Rosa knock-in mice were generated by introducing the most common missense mutation encountered in leiomyomas of American women, c.131G>A (p.Gly44Asp) (1), into the *Med12* cDNA. Full-length mouse *Med12* cDNA was cloned into pEntry vector (Invitrogen). The *Med12* 1.6 kbp fragment was PCR amplified from mouse newborn ovary cDNA, using the following primer set: pEntry-mMed12 F: CACCATGGCGGCTTTCGGGATCTT and pEntry-mMed12 R1: GCGGCCGCGAATTCTACTCGCTCACTT. The amplified *Med12* 1.6 kbp fragment was ligated with *Med12* EST clone (BC057119, GE Dharmacon) and EcoR1 and NOT1 cut 6.5 kbp fragment. The full-length *Med12* sequence (8.1 kbp) was confirmed by sequencing. Site-directed mutagenesis was performed using QuikChange Multi Site-Directed Mutagenesis Kit (Stratagene), with Mde12131AF:

ACGGCTTTGAATGTAAAACAAGATTTCAATAACCAGCCTGCTGTC and  
Mde12131AR:GACAGCAGGCTGGTTATTGAAATCTTGTTTTACATTCAAAGCCGT

primers used according to manufacturer instructions. pROSA26-DV1 vector was used to target the *ROSA26* locus (2). Mutated *Med12* cDNA was inserted into the pROSA26-DV1, using LR Clonase Enzyme Mix (Invitrogen). Electroporation was performed, using G4 ES cells, at the MWRI transgenic core. Two ES cell clones were selected for blastocyst injection after confirming appropriate integration into the *ROSA 26* locus using *Rosa26* 5' probe (*Rosa* 5' probe F: GCTCAGAGACTCACGCAGCCCTAGT and *rosa* 5' probe R: AGAGTAGGGGGAGGGGAAGAGTCCT) and *Rosa26* 3' probe (*Rosa* 3' probe F:CTCCCAAGTGTTGGGAAGTAAAGATA and *Rosa* 3' probe R: GCTACATCCTGATCTAGTCCTGAA) (Supplemental Figure2A,B). *Med12* ROSA knock-in mice were maintained on a FVB/C57BL/6/129SV background.

Dr. Heinrich Schrewe generously donated the *Med12 flox* mice (3). The *Amhr2-Cre* mice were a kind gift of Dr. Richard Behringer (4). The *mT/mG* mice (GT(ROSA)26Sor<sup>tm4(ACTB-tdTomato,-EGFP)<sup>Lou</sup></sup>) were obtained from Jackson laboratory (Stock #007576). The DNA from tail biopsies was used to confirm the genotypes, using standard PCR protocols. The primer sets and the PCR protocol used to distinguish the *Med12<sup>flox</sup>* wild-type and the recombined alleles in tissue genomic DNA have previously been described (3). The *Med12<sup>flox</sup>* and *Amhr2-Cre* lines were maintained on a C57BL/6/129SV hybrid background. Litters were weaned at 3 weeks, and breeding pairs were set up at 6 weeks of age. All animals were housed under a 12-hour light, 12-hour dark schedule and provided food and water ad libitum.

## **Histology, immunohistochemistry, immunofluorescence, and Western blot analysis**

Gross morphology and histology assessments were performed on adult female mice. Prior to harvesting the uteri, all females were estrous synchronized with IP injections of 5 IU PMSG followed by 5 IU of hCG after 48 hours. Females were euthanized 20 hours after hCG administration, and uteri were fixed in 10% formalin, processed, embedded in paraffin, serially sectioned (6  $\mu$ m), and stained with hematoxylin and eosin. For Frozen sections, tissues were embedded in O.C.T. medium and were snap-frozen in liquid nitrogen. Sections were obtained using a Leica cryostat (6  $\mu$ m). At least three pairs of uteri of each genotype were subjected to gross and microscopic analysis for each time point. Uteri were also subjected to Masson's Trichrome staining (American MasterTech). Images were acquired using an Axio Scope.A1 microscope (Zeiss) equipped with a digital camera (Zeiss) and an AxioVision (v4.8) imaging software.

Immunohistochemistry was performed on 6- $\mu$ m paraffin sections and subjected to antigen retrieval using 10 mM sodium citrate (PH 6.0) for 20 min. For quenching endogenous peroxidase, sections were treated with 3% hydrogen peroxide and then blocked with 3% bovine serum albumin for 45 min, followed by incubation with anti-SMA (A5228, Sigma Aldrich) at 4°C overnight. Following primary antibody incubation, sections were washed and incubated in biotinylated secondary antibody for 30 min and ABC reagent (Vectastain). DAB Substrate Kit (Vector Labs) was then used to develop the immunoreactive signals.

Immunofluorescence was conducted on 6- $\mu$ m frozen sections, using a similar protocol, except that the secondary antibodies were Alexa Fluor 488 (Life Technologies) and Alexa Fluor 647 (Life Technologies). Primary Anti-FLAG (F7425, Sigma Aldrich) antibody was used for immunofluorescence. The sections were mounted with Vectashield mounting medium containing DAPI. Images were taken with a Nikon A1 confocal microscope equipped with a digital camera and NIS-Elements software (Nikon).

To assess the fluorescent signals in the *mT/mG* reporter mice, frozen sections were washed three times in PBS and stained with DAPI. mT and mG signals were analyzed and scored in 300 uterine myometrial cells.

For Western blots, nuclear and cytoplasmic extracts were prepared from pulverized mouse uterine samples as described previously (5). Equal amounts of protein were loaded and resolved on 3-8% Tris-acetate gels (Life Technologies). Membranes were then incubated in either anti-FLAG (F7425, Sigma Aldrich) or  $\beta$ -tubulin antibodies (T0198, Sigma Aldrich) overnight at 4°C. The following day, the membranes were washed and incubated in respective secondary antibodies for 1 hour and developed using ECL-Prime (GE, Amersham).

## **DNA isolation**

Genomic DNA was isolated from frozen tissue samples using DNeasy Blood & Tissue Kit (Qiagen) according to the manufacturer's protocol and was quantitated using a NanoDrop spectrophotometer (Thermo Scientific) as well as Qubit (Life Technologies).

## **Array CGH**

Agilent SurePrint G3 Mouse Genome CGH 180K microarray kits were used to conduct array CGH on mouse uteri. Genomic DNA from uteri of four *Med12<sup>fl/+</sup> Med12<sup>mt/+</sup> Amhr2-Cre* females was used as the "test" DNA and corresponding littermate control without *Amhr2-Cre* as the "reference" DNA. The samples were labeled, hybridized, and scanned according to the manufacturer's protocol. Briefly, 750 ng of test and reference DNA were digested with Alu I and Rsa I (Promega) and labeled with Cy3-dCTP (Test) or with Cy5- dCTP (Reference). The labeled DNA was purified and hybridized, washed, and scanned using an Agilent G2565CA Microarray Scanner. Raw data were obtained by Agilent Feature extraction software and imported into the Agilent Genomic Workbench 7.0 software for analysis. DNA copy number changes were detected by Genomic Workbench software. The ADM-2 statistical algorithm was used with a sensitivity of 6.0. The criteria for making aberration calls included positive calls by the software, log<sub>2</sub> ratios of >0.25 or less than <-0.25, and the presence of three consecutive probes.

## **Human syntenic mapping**

Mouse chromosomal aberrations were mapped onto human chromosomal loci using the UCSC genome browser LiftOver tool (<http://genome.ucsc.edu>). The gene lists for the

human intervals were determined by the microarray core website developed jointly by the University of Miami and Oklahoma University ([www.ccs.miami.edu/cgi-bin/ROH/ROH\\_analysis\\_tool.cgi](http://www.ccs.miami.edu/cgi-bin/ROH/ROH_analysis_tool.cgi)).

### **Reverse transcription, quantitative real-time PCR, and *Med12* variant expression detection**

Total RNA was isolated from frozen uteri using the RNeasy Mini Kit (Qiagen). One microgram of total RNA was reverse transcribed using Superscript III reverse transcriptase (Invitrogen). *Med12* gene expression was analyzed by real-time quantitative polymerase chain reaction. A SYBR Green detection system (Bio-Rad CFX96 PCR Detect System) was used, along with customized *Med12* primer sets: Med126-7F: CTGACTTGGGTGCTTGAGTGTT and Med126-7R: CCAATCTCCGGGTACAGAAGTA. Melt curve analysis was performed when using SYBR Green to verify a single amplification peak. Data were normalized to an endogenous reference (*GAPDH*) and then relative mRNA expression was calculated using the  $2^{-\Delta\Delta C}$  method.

*Med12* exon 2 C.131 G>A variant was detected in mutant mouse uteri by performing PCR, followed by Sanger sequencing using the following forward and reverse oligonucleotide that bracketed the *Med12* exon 2 C.131 G>A variant: *Med12* F: ATGGCGGCTTTCGGGATCTT and *Med12* R: AGTTGGAAGTCTTGGCAGG primers, designed in Primer3 (<http://bioinfo.ut.ee/primer3-0.4.0>). Sequencing results were analyzed using Sequencher software.

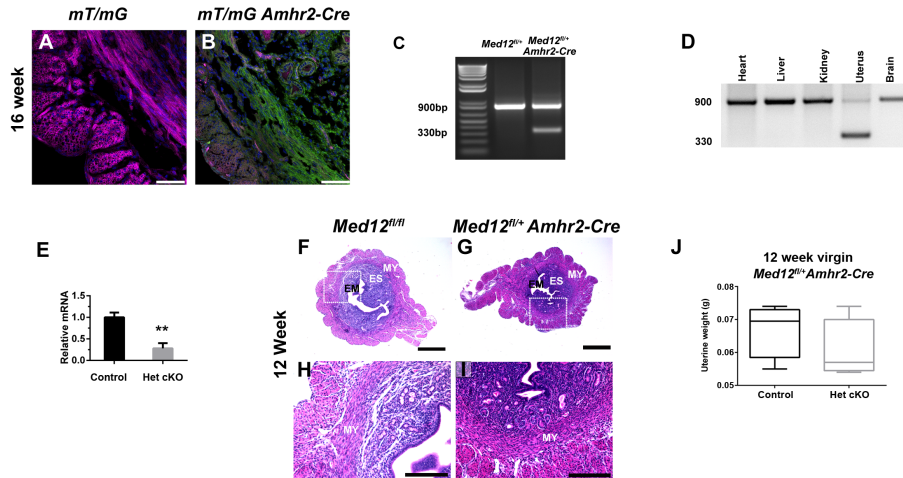

**Supplemental Figure 1. Evaluation of *Amhr2-Cre* activity and histology of uteri with loss of *Med12*.** We used *mT/mG* mice to assess the efficiency of *Amhr2-Cre* recombination. **(A)** 16-week-old *mT/mG* mice display ubiquitous mT (Tomato) labelling prior to recombination. **(B)** 16-week-old *mT/mGAmhr2-Cre* uteri display mG (Green) expression in cells having undergone cre-mediated excision. The non-recombined cells still display mT expression. **(C)** Recombination of *Med12* floxed alleles in uterine genomic DNA of *Med12<sup>fl/+</sup> Amhr2-Cre* females. *Med12* recombined bands are detected at 330 bp in the genomic DNA of cKO but not in the uterine genomic DNA of controls (*Med12<sup>fl/fl</sup>*). **(D)** The recombined bands (330 bp) were only detected in the genomic DNA of the uterus and not in other tissues such as the liver, heart, or kidneys. **(E)** Relative *Med12* mRNA levels are down-regulated in uteri of *Med12* cKO (n=4) as compared to *Med12<sup>fl/fl</sup>* uteri (n=4). Relative mRNA levels of *Med12* were normalized to *Gapdh*. The mRNA expression studies were replicated on n=4 samples three independent times. Histological evaluation of 12 week old nulliparous **(F)** control, *Med12<sup>fl/fl</sup>*, uteri and **(G)** loss of function, *Med12<sup>fl/+</sup> Amhr2-Cre*, uteri reveals no differences in histology

and lack of leiomyoma-like lesions. We have also analyzed the uterine histology of 4-month-, 6-month-, and 8-month-old *Med12<sup>fl/+</sup> Amhr2-Cre* females (n=10) and have not observed uterine tumors. The white dotted regions in panels (F) and (G) are shown at higher magnification in panels (H) and (I), respectively. (J) Uterine weights of *Med12<sup>fl/+</sup> Amhr2-Cre* mice (n=7) did not significantly differ from that of *Med12<sup>fl/+</sup>*,  $p>0.05$ . Data are presented as mean  $\pm$  SD. ES-endometrial stroma; MY-myometrium; EM-endometrium. Scale Bars = 0.2 $\mu$ m (F,G), 20 $\mu$ m (H,I).

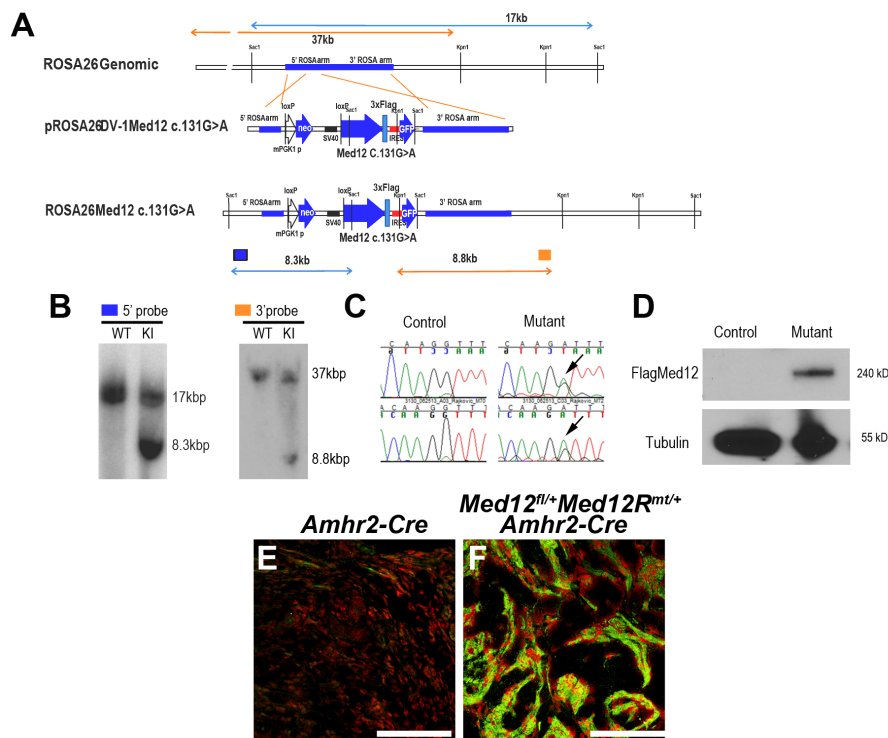

**Supplemental Figure 2. Generation of *ROSA26 Med12 c.131G>A* mice that conditionally express *Med12 c.131G>A* variant. (A)** Mouse *Med12* cDNA was mutated and inserted into the pROSA26-DV1 vector (pROSA26DV-1Med12 c.131G>A) and electroporated into G4 ES cells for homologous recombination with *ROSA26* genomic locus to generate *ROSA26 Med12 c.131G>A* mice.



Mutated *Med12* transcripts expressed from the *ROSA26* locus are fused with FLAG and GFP. **(B)** Southern blot on DNA extracted from recombined G4 ES cells shows targeting of mutated *Med12* to the *ROSA26* locus. Probes corresponding to the 5' (blue) and 3' (orange) targeting ends are expected to generate 17-Kb wild-type and 8.4-kb mutant fragments and 37-kb wild-type and 8.8-kb mutant fragments, respectively, when genomic DNA is digested with Sac I and Kpn I enzymes. **(C)** Uteri from mice that carry the mutation in the absence of *Amhr2-Cre* (*Med12<sup>fl/+</sup> Med12R<sup>mt/+</sup>*) do not express mutant mRNA, while in the presence of *Amhr2-Cre* (*Med12<sup>fl/+</sup> Med12R<sup>mt/+</sup> Amhr2-Cre*), uteri show significant expression of mutant c.131G>A variant (green chromatogram peak, black arrows). **(D)** Western blot analysis shows expression of mutant Med12 protein fused with FLAG in *Med12R<sup>mt/+</sup> Amhr2-Cre* uteri as compared to control (*Med12R<sup>mt/+</sup>*) uteri that are devoid of *Amhr2-Cre*. Tubulin is used as a loading control. **(E,F)** Immunostaining with FLAG antibody shows FLAG expression as a marker for mutant Med12 expression in uteri of *Med12<sup>fl/+</sup> Med12R<sup>mt/+</sup> Amhr2-Cre* females as compared to control uteri (*Amhr2-Cre*). These results indicate that tumors express mutant *Med12*. Green: FLAG expression, Red: DAPI staining. Scale bars = 50µm (E,F).

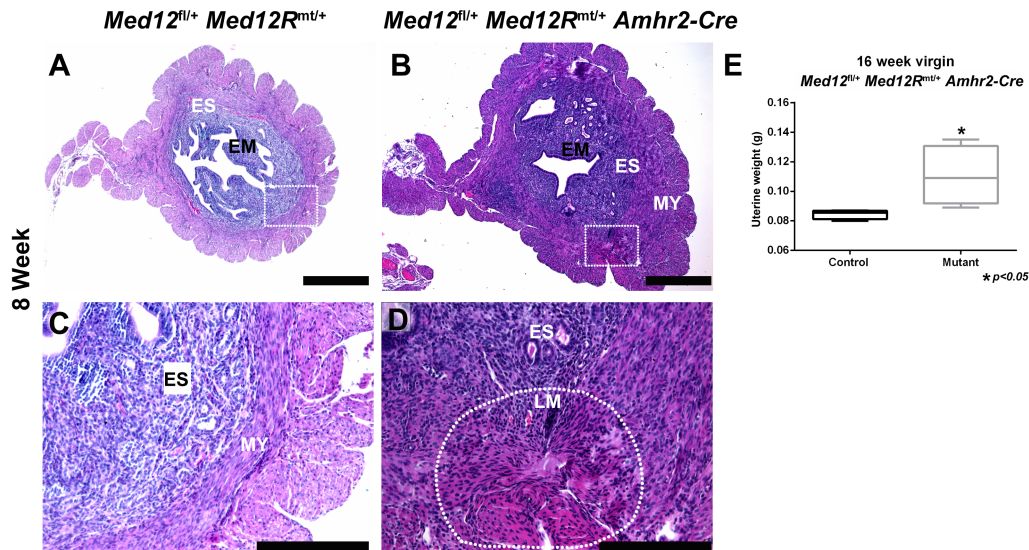

**Supplemental Figure 3. Histological evaluation of uteri from *Med12<sup>fl/+</sup> Med12R<sup>mt/+</sup> Amhr2-Cre* females.** (A) Control animals (*Med12<sup>fl/+</sup> Med12R<sup>mt/+</sup>*) show normal uterine histology; a magnified view of the white box shows normal endometrial stroma (ES) and myometrium (MY) in (C). (B) Pathological changes associated with leiomyomas, including hyperplasia, are observed as early as 8 weeks (three of four females) in uteri expressing *Med12 c.131G>A* variant on the background of conditional *Med12* loss (*Med12<sup>fl/+</sup> Med12R<sup>mt/+</sup> Amhr2-Cre*). A higher magnification of the white outlined box appears in (D), which shows leiomyoma-like lesions characterized by extracellular matrix deposits and dispersed nuclei. (E) Mutant uteri weights (n=4) at 16 weeks were significantly higher than controls (n=4) ( $p < 0.05$ ). Uterine weights were determined from four animals in each group. Data are presented as mean  $\pm$  SD. LM-leiomyoma; ES-endometrial stroma; MY-myometrium; EM-endometrium. Scale Bars = 0.2 $\mu$ m (A,B), 20 $\mu$ m (C,D).

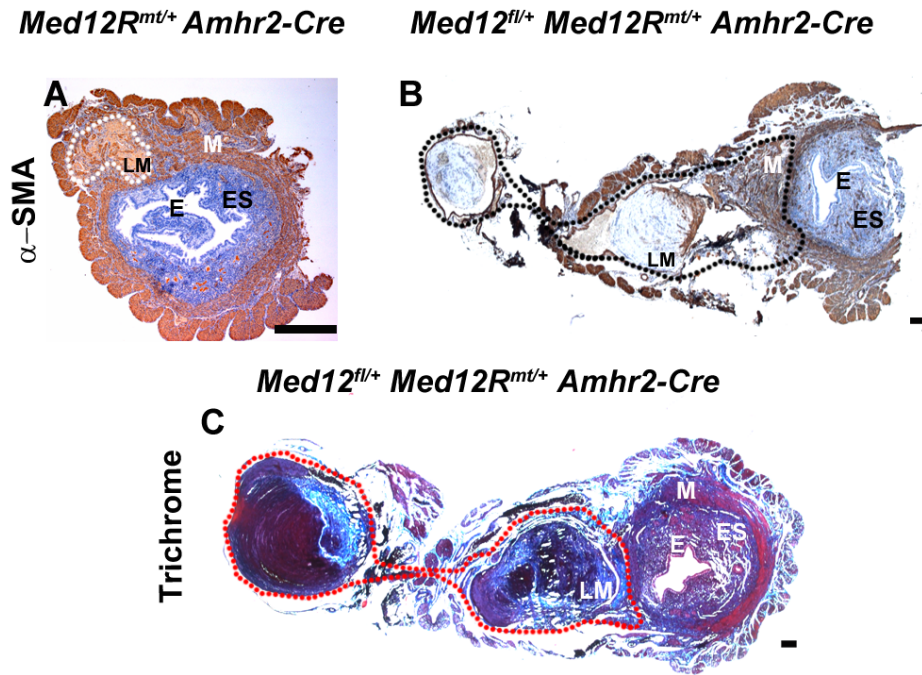

**Supplemental Figure 4. Molecular characterization of leiomyoma-like lesions in mutant *Med12* uteri.** (A) and (B) are representative images from *Med12R<sup>mt/+</sup> Amhr2-Cre* and *Med12<sup>fl/+</sup> Med12R<sup>mt/+</sup> Amhr2-Cre* mice, showing immunoreactivity to anti-SMA antibodies and staining with Masson's Trichrome. Anti-SMA antibodies show immunoreactivity (brown) in the leiomyoma-like lesion (LM) outlined with a dotted white line. SMA is a marker for smooth muscle cells. Collagen deposits within the uterine tumors stain blue with Masson's Trichrome (C). Red stains show muscle fibers; the blue stain indicates an abundance of collagen deposition in the tumor lesion, a known characteristic of leiomyomas. ES- endometrial stroma; M- myometrium; E- endometrium. Bars = 0.2 $\mu$ m (A), 100 $\mu$ m (B, C).

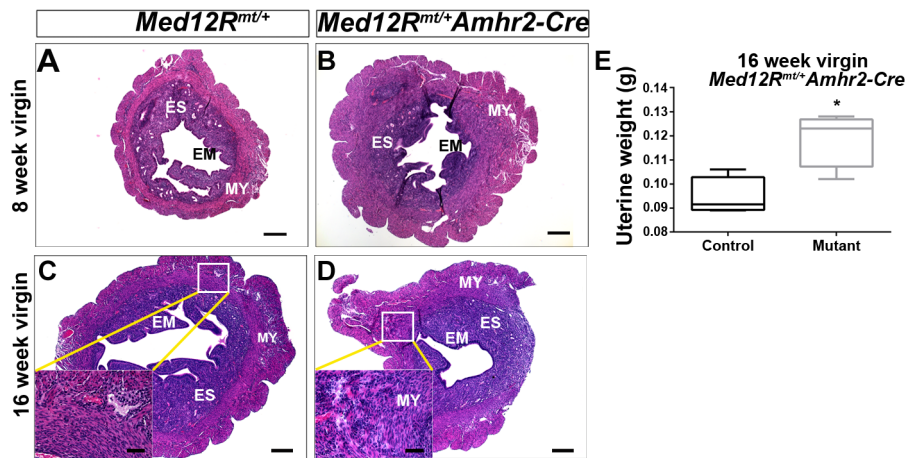

**Supplemental Figure 5. Histological evaluation of uteri from *Med12R<sup>mt/+</sup> Amhr2-Cre* females. (A,B)** No significant pathological changes other than hyperplasia are observed in uteri of *Med12R<sup>mt/+</sup> Amhr2-Cre* at 8 weeks of age (three out of four mice), as shown in (B) as compared to controls (*Med12R<sup>mt/+</sup>*) in (A). (C,D) No abnormal lesions were observed in uteri of control mice (C), while four out of eight uteri from 12-week-and-older *Med12R<sup>mt/+</sup> Amhr2-Cre* females (D) showed leiomyoma-like lesions displaying disorganized muscle fiber arrangement and extracellular matrix deposition associated with leiomyoma formation. Insets in (C) and (D) are amplified regions in white squares. (E) Uteri of *Med12R<sup>mt/+</sup> Amhr2-Cre* females (n=4) weighed significantly higher than those of control (*Med12R<sup>mt/+</sup>*) females (n=4). Data are presented as mean  $\pm$  SD. LM-leiomyoma; ES-endometrial stroma; MY-myometrium; EM-endometrium. Scale Bars = 200 $\mu$ m (A,B,C,D), 50  $\mu$ m (insets).

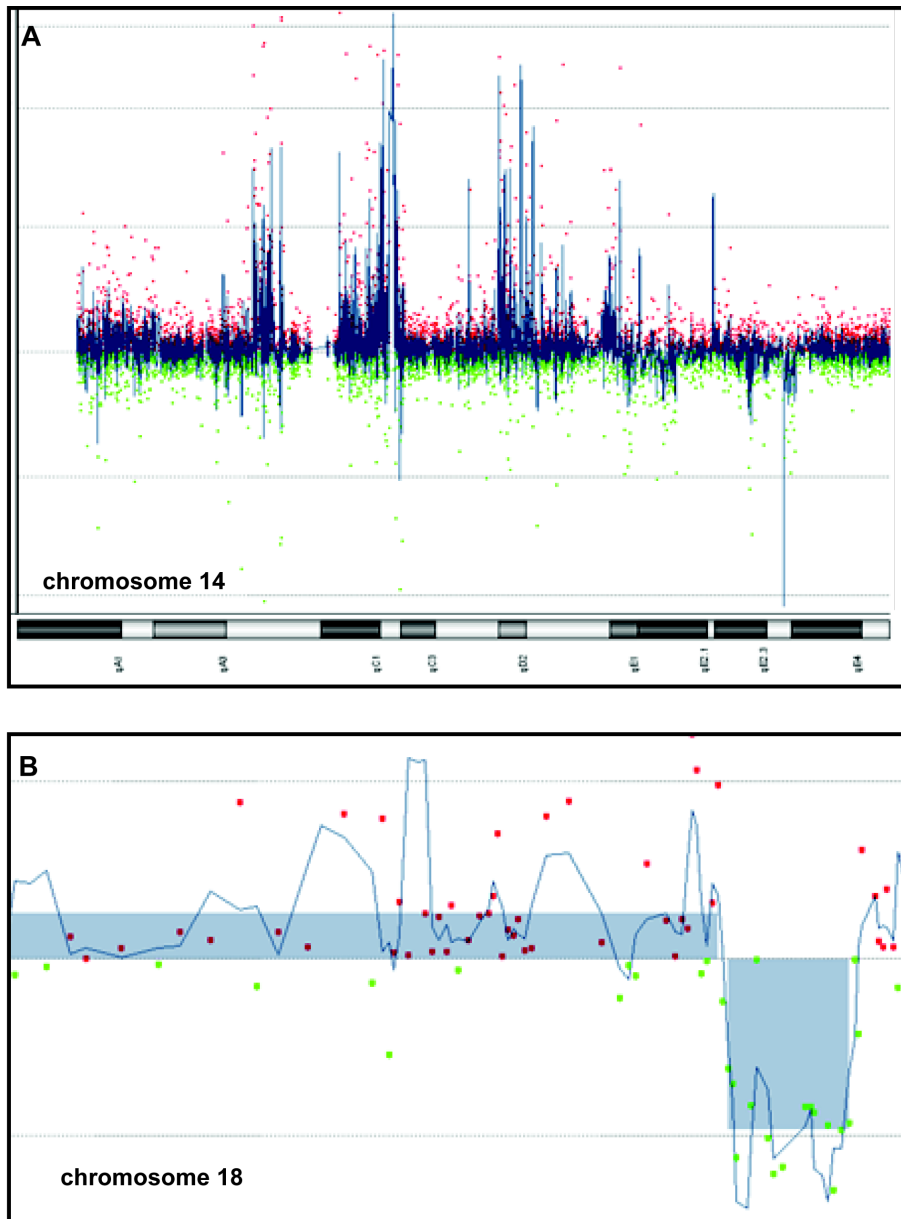

**Supplemental Figure 6. Representative array profiles from tumors of *Med12<sup>fl/+</sup> Med12R<sup>mt/+</sup> Amhr2-Cre* females. (A) Chromosome view of mouse chromosome 14 of *Med12<sup>fl/+</sup> Med12R<sup>mt/+</sup> Amhr2-Cre* uteri showing chromothripsis. (B) Representative example of mosaic gain followed by a loss of region 18qA1 (chr18: 8457226-10017847). This region of approximately 345 kb encompasses the genes *Fzd8*, *Ccny*, *Cetn1*, *Thoc1*, *Usp14*, and *Colec12*.**

| <b>Chromosome</b> | <b>Cytoband</b> | <b>Start</b> | <b>Stop</b> | <b>Aberration size (Kb)</b> | <b>Gain/Loss</b> | <b>Region of Aberration</b> |
|-------------------|-----------------|--------------|-------------|-----------------------------|------------------|-----------------------------|
| chr1              | qD              | 90115633     | 90193738    | 78.105                      | deletion         | 3                           |
| chr1              | qE1.1           | 101591968    | 101656500   | 64.532                      | gain             | 1                           |
| chr1              | qH4             | 179805696    | 179926632   | 120.936                     | deletion         | 1                           |
| chr1              | qH5             | 187079059    | 187183640   | 104.581                     | gain             | 1                           |
| chr2              | qA1             | 3947206      | 4016684     | 69.478                      | deletion         | 3                           |
| chr2              | qC1.3           | 62554677     | 62580394    | 25.717                      | deletion         | 4                           |
| chr2              | qD              | 85849412     | 85920056    | 70.644                      | gain             | 4                           |
| chr2              | qH2             | 161545931    | 161698753   | 152.822                     | gain             | 1                           |
| chr3              | qF1             | 87188304     | 87211687    | 23.383                      | gain             | 1                           |
| chr3              | qF1             | 87267733     | 87302881    | 35.148                      | gain             | 1                           |
| chr3              | qF3             | 110878881    | 110995945   | 117.064                     | gain             | 1                           |
| chr4              | qD1             | 111726014    | 113251939   | 1525.925                    | deletion         | 4                           |
| chr4              | qD1             | 111742887    | 112273763   | 530.876                     | deletion         | 4                           |
| chr4              | qD1             | 111962345    | 112065411   | 103.066                     | deletion         | 4                           |
| chr4              | qD1             | 112289418    | 112504314   | 214.896                     | deletion         | 3                           |
| chr4              | qD1             | 112510205    | 112564300   | 54.095                      | deletion         | 4                           |
| chr4              | qD1             | 112665000    | 112793116   | 128.116                     | deletion         | 4                           |
| chr4              | qD1             | 112821289    | 112915923   | 94.634                      | deletion         | 4                           |
| chr4              | qD1             | 113001582    | 113251939   | 250.357                     | deletion         | 2                           |
| chr4              | qD1             | 113286238    | 113658273   | 372.035                     | deletion         | 1                           |
| chr4              | qD2.2           | 121649423    | 122218644   | 569.221                     | deletion         | 1                           |
| chr4              | qD2.3           | 132799884    | 132936192   | 136.308                     | deletion         | 1                           |
| chr4              | qE1             | 145001092    | 146793868   | 1792.776                    | deletion         | 3                           |
| chr5              | qC3.1           | 69891606     | 70097860    | 206.254                     | gain             | 3                           |
| chr5              | qE5             | 105142362    | 105237345   | 94.983                      | gain             | 1                           |
| chr6              | qA1             | 8556759      | 8575270     | 18.511                      | gain             | 1                           |
| chr6              | qB1             | 41010073     | 41112757    | 102.684                     | gain             | 1                           |
| chr6              | qB1             | 41306470     | 41412425    | 105.955                     | gain             | 2                           |
| chr7              | qA2             | 18382929     | 18426616    | 43.687                      | gain             | 1                           |
| chr7              | qB4             | 54844755     | 54883844    | 39.089                      | deletion         | 2                           |
| chr7              | qB4             | 55466579     | 55715246    | 248.667                     | gain             | 1                           |
| chr7              | qC              | 67475144     | 67731725    | 256.581                     | deletion         | 1                           |
| chr7              | qE3             | 111430424    | 111507023   | 76.599                      | deletion         | 1                           |
| chr7              | qF1             | 123631491    | 123927328   | 295.837                     | deletion         | 2                           |
| chr7              | qF3             | 136825759    | 137141925   | 316.166                     | gain             | 1                           |
| chr8              | qA1.2           | 16763830     | 16826155    | 62.325                      | gain             | 1                           |
| chr8              | qA4             | 40187843     | 40274870    | 87.027                      | gain             | 1                           |
| chr9              | qA3             | 21968269     | 22021024    | 52.755                      | deletion         | 1                           |
| chr9              | qA5.3           | 46697499     | 46906183    | 208.684                     | deletion         | 0                           |
| chr10             | qA3             | 17697339     | 17744401    | 47.062                      | deletion         | 1                           |
| chr10             | qA3             | 22006887     | 22072759    | 65.872                      | gain             | 1                           |

|       |           |           |           |          |          |   |
|-------|-----------|-----------|-----------|----------|----------|---|
| chr12 | qE        | 105048428 | 105263855 | 215.427  | deletion | 2 |
| chr12 | qF1       | 114886825 | 114956321 | 69.496   | gain     | 4 |
| chr12 | qF1 - qF2 | 115427710 | 115487987 | 60.277   | deletion | 4 |
| chr12 | qF2       | 115667710 | 115852666 | 184.956  | gain     | 4 |
| chr12 | qF2       | 116155408 | 116261498 | 106.09   | deletion | 4 |
| chr12 | qF2       | 116515691 | 116624944 | 109.253  | deletion | 4 |
| chr12 | qF2       | 116840011 | 117047397 | 207.386  | gain     |   |
| chr12 | qF2       | 117198164 | 117274793 | 76.629   | deletion |   |
| chr13 | qA1       | 12690823  | 12723384  | 32.561   | Deletion | 2 |
| chr13 | qB3       | 61743712  | 62048006  | 304.294  | gain     | 1 |
| chr13 | qC1       | 75983645  | 76020728  | 37.083   | Deletion | 1 |
| chr13 | qD1       | 101053361 | 101110842 | 57.481   | deletion | 1 |
| chr14 | qC1       | 44380406  | 44579789  | 199.383  | Gain     | 1 |
| chr14 | qC2       | 54320774  | 54422503  | 101.729  | gain     | 1 |
| chr14 | qD1       | 69019011  | 69103662  | 84.651   | gain     | 1 |
| chr14 | qD2       | 69209459  | 69249991  | 40.532   | gain     | 1 |
| chr14 | qD2       | 69876584  | 70090608  | 214.024  | deletion | 2 |
| chr14 | qD2       | 72891034  | 72930683  | 39.649   | gain     | 1 |
| chr14 | qD3       | 84908855  | 85042415  | 133.56   | gain     | 1 |
| chr14 | qE1       | 86407031  | 86441138  | 34.107   | gain     | 1 |
| chr14 | qE3       | 110472070 | 111123931 | 651.861  | deletion | 1 |
| chr14 | qE3 - qE4 | 110015732 | 111565569 | 1549.837 | deletion | 1 |
| chr15 | qA1       | 14992022  | 15100240  | 108.218  | gain     |   |
| chr15 | qE1       | 77310653  | 77364452  | 53.799   | gain     | 3 |
| chr16 | qB3       | 35483725  | 35550180  | 66.455   | gain     | 1 |
| chr16 | qB3       | 36245661  | 36336077  | 90.416   | deletion | 1 |
| chr16 | qB4       | 44819587  | 44909082  | 89.495   | gain     | 1 |
| chr17 | qA3.3     | 30586287  | 31049473  | 463.186  | gain     | 4 |
| chr17 | qB1       | 36199712  | 36245963  | 46.251   | gain     | 1 |
| chr17 | qB1       | 36860348  | 36909276  | 48.928   | deletion | 1 |
| chr17 | qB1       | 38635045  | 38791870  | 156.825  | gain     | 1 |
| chr17 | qB1 - qB2 | 40082709  | 40241053  | 158.344  | deletion | 4 |
| chr18 | qA1       | 8457226   | 9788370   | 1331.144 | gain     | 1 |
| chr18 | qA1       | 9813671   | 10017847  | 204.176  | deletion | 3 |
| chr19 | qD3       | 60897053  | 60945155  | 48.102   | Gain     | 1 |

**Table S1:** Chromosomal aberration list of all four mouse tumors, with the respective intervals

| Mouse      | Human             | Human     |           | Orthologous genes                    |                        |                                     |                        |
|------------|-------------------|-----------|-----------|--------------------------------------|------------------------|-------------------------------------|------------------------|
| Chromosome | chromosomal locus | Start     | Stop      | Tumor 1                              | Tumor 2                | Tumor 3                             | Tumor 4                |
| 4qD2.3     | chr1              | 27470631  | 27690372  |                                      |                        | SLC9A1,CHCHD3P3,WDTTC1,SYTL1,MAP3K6 |                        |
| 3qF3       | chr1              | 106701046 | 106830733 | -                                    | -                      |                                     |                        |
| 3qF1       | chr1              | 157764252 | 157772664 |                                      |                        | FCRL1                               |                        |
| 1qH5       | chr1              | 220229780 | 220359711 | BPNT1,IARS2,MIR215,MIR194-1,RAB3GAP2 |                        |                                     |                        |
| 13qA1      | chr1              | 236368354 | 236390748 |                                      |                        | ERO1LB,GPR137B                      | ERO1LB,GPR137B         |
| 1qH4       | chr1              | 244734347 | 244817416 |                                      | DES12,COX20            |                                     |                        |
| 1qE1.1     | chr2              | 124573472 | 124762072 |                                      |                        |                                     |                        |
| 2qC1.3     | chr2              | 163236878 | 163260207 |                                      |                        |                                     |                        |
| 1qD        | chr2              | 234682002 | 234812683 |                                      | HJURP,TRPM8,SPP2       | HJURP,MSL3P1                        | HJURP,MSL3P1,TRPM8     |
| 16qB3      | chr3              | 122738925 | 122793361 |                                      |                        | SEMA5B,PDIA5                        |                        |
| 5qC3.1     | chr4              | 44613169  | 44931460  |                                      | GNPDA2                 | YIPF7,GUF1,GNPDA2                   | YIPF7,GUF1,GNPDA2      |
| 8qA4       | chr4              | 190221667 | 190228149 |                                      |                        |                                     |                        |
| 13qC1      | chr5              | 95111576  | 95153221  |                                      |                        | RHOBTB3,GLRX                        |                        |
| 15qA1      | chr5              | 29027869  | 29199306  |                                      |                        |                                     |                        |
| 13qD2.3    | chr5              | 45614983  | 45626841  | HCN1                                 | HCN1                   |                                     |                        |
| 13qD1      | chr5              | 66052023  | 66071066  |                                      |                        |                                     |                        |
| 13qD1      | chr5              | 70265907  | 70308766  |                                      | NAIP                   |                                     |                        |
| 17qA3.3    | chr6              | 38457579  | 39028735  | BTBD9,GLO1,DNAH8,GLP1R               | BTBD9,GLO1,DNAH8,GLP1R | BTBD9,GLO1,DNAH8                    | BTBD9,GLO1,DNAH8,GLP1R |
| 10qA3      | chr6              | 139348580 | 139403048 |                                      |                        | ABRACL                              | ABRACL                 |
| 6qA1       | chr7              | 8134096   | 8148036   |                                      |                        |                                     |                        |
| 6qB1       | chr7              | 142190236 | 142250584 |                                      |                        |                                     |                        |
| 8qA4       | chr8              | 15586895  | 15636766  |                                      | TUSC3                  |                                     |                        |
| 14qD2      | chr8              | 23158977  | 23414178  |                                      | LOXL2,ENTPD4,SLC25A37  |                                     |                        |
| 14qD2      | chr8              | 24187964  | 24229697  | ADAM28                               |                        |                                     |                        |



|            |       |           |           |                             |                             |                                            |                             |
|------------|-------|-----------|-----------|-----------------------------|-----------------------------|--------------------------------------------|-----------------------------|
| 14qD1      | chr8  | 24383271  | 24461193  |                             |                             |                                            |                             |
| 14qD2      | chr8  | 36716399  | 36733668  | KCNU1                       |                             |                                            |                             |
| 8qA1.2     | chr8  | 3989107   | 4060094   |                             |                             |                                            |                             |
| 2qA1       | chr10 | 14283901  | 14363312  |                             |                             | FRMD4A                                     | FRMD4A                      |
| 18qA1      | chr10 | 35739803  | 36669673  | CCNY,GJD<br>4,FZD8          |                             |                                            |                             |
| 19qD3      | chr10 | 120876971 | 120932106 |                             |                             |                                            | SFXN4,<br>COXPD13,<br>PRDX3 |
| 7qF3       | chr10 | 122740826 | 123058528 |                             |                             |                                            |                             |
| 2qD        | chr11 | 56216083  | 56241010  |                             | SLC25A37                    |                                            |                             |
| 9qA5.3     | chr11 | 115811243 | 116008575 | KCNU1                       |                             |                                            |                             |
| 14qD3      | chr13 | 58275467  | 58409706  | PCDH17                      |                             |                                            |                             |
| 14qE1      | chr13 | 59632641  | 59660044  |                             |                             |                                            |                             |
| 14qE3<br>- |       |           |           |                             |                             | SLITRK6,<br>MOB1AP1,<br>DDX6P2,<br>TXNL1P1 |                             |
| 14qE4      | chr13 | 85181293  | 87535910  |                             |                             |                                            |                             |
| 14qE3      | chr13 | 85660155  | 86345915  |                             |                             |                                            |                             |
| 12qE       | chr14 | 94879399  | 94946027  |                             |                             | SERPINA11,<br>SERPINA9                     |                             |
| 12qF1      | chr14 | 106209967 | 106242264 |                             |                             |                                            |                             |
| 7qF1       | chr16 | 18175137  | 18325190  |                             |                             |                                            |                             |
| 11qB5      | chr17 | 2938562   | 2948297   |                             |                             |                                            |                             |
| 11qB4      | chr17 | 5417772   | 5463831   |                             | NLRP1                       |                                            |                             |
| 18qA1      | chr18 | 179212    | 391932    | USP14,TH<br>OC1,COLE<br>C12 | USP14,TH<br>OC1,COLE<br>C12 |                                            | USP14,THOC1,C<br>OLEC12     |
| 2qH2       | chr20 | 40900568  | 41046759  |                             |                             |                                            | PTPRT                       |

**Table S2:** List of human chromosomal intervals that are syntenic to mouse chromosomal aberration intervals and conserved orthologous genes in the conserved regions

## References

1. McGuire MM, Yatsenko A, Hoffner L, Jones M, Surti U, and Rajkovic A. Whole exome sequencing in a random sample of North American women with leiomyomas identifies MED12 mutations in majority of uterine leiomyomas. *PLoS one*. 2012;7(3):e33251.
2. Nyabi O, Naessens M, Haigh K, Gembarska A, Goossens S, Maetens M, De Clercq S, Drogat B, Haenebalcke L, Bartunkova S, et al. Efficient mouse transgenesis using Gateway-compatible ROSA26 locus targeting vectors and F1 hybrid ES cells. *Nucleic Acids Research*. 2009;37(7).
3. Rocha PP, Scholze M, Bleiss W, and Schrewe H. Med12 is essential for early mouse development and for canonical Wnt and Wnt/PCP signaling. *Development*. 2010;137(16):2723-31.
4. Jamin SP, Arango NA, Mishina Y, Hanks MC, and Behringer RR. Requirement of Bmpr1a for Mullerian duct regression during male sexual development. *Nature genetics*. 2002;32(3):408-10.
5. Jeyasuria P, Wetzel J, Bradley M, Subedi K, and Condon JC. Progesterone-regulated caspase 3 action in the mouse may play a role in uterine quiescence during pregnancy through fragmentation of uterine myocyte contractile proteins. *Biology of reproduction*. 2009;80(5):928-34.
